# Supplementary material for: Differentiation of primate primordial germ cell-like cells following transplantation into the adult gonadal niche
Source: PubMed Central journal article supplement (PMC6297357; doi:10.1038/s41467-018-07740-7), 2018-12-17
Supplement: 41467_2018_7740_MOESM1_ESM.pdf [file 41467_2018_7740_MOESM1_ESM.pdf]

**Sosa *et al.* Differentiation of primate primordial germ cell-like cells following transplantation into the adult gonadal niche**

Supplementary Information: 6 figures and 1 table

**a**

Day 28 rhesus embryo

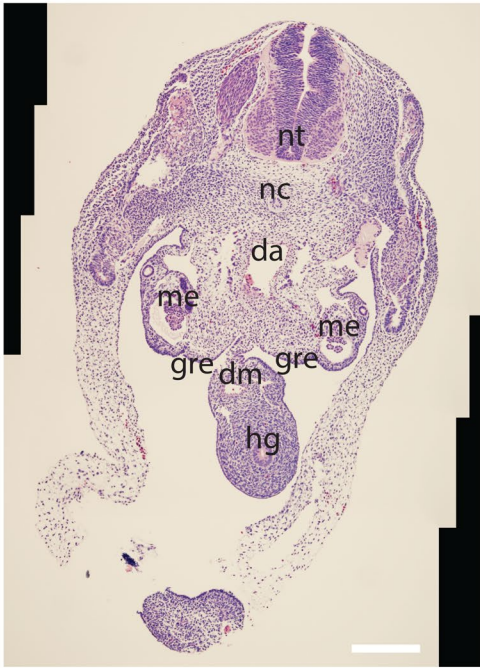**b**dorsal mesentery  
(proximal to the  
hindgut)dorsal mesentery  
(distal to the  
hindgut)genital ridge  
epithelium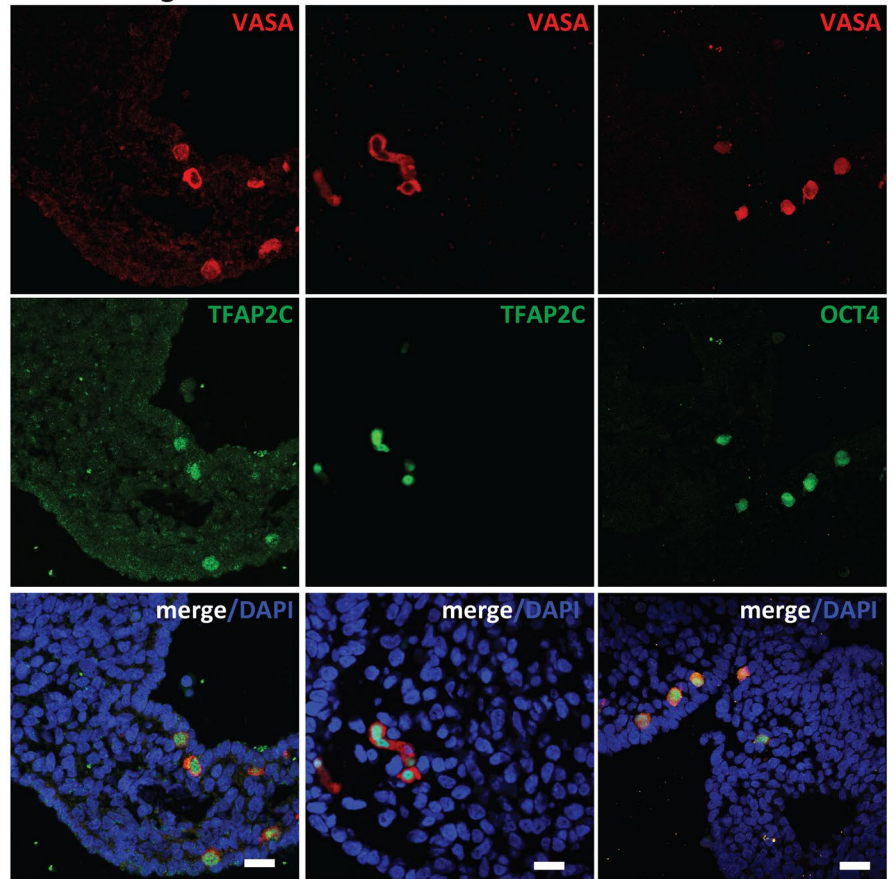

**Supplementary Figure 1** | rPGCs at CS12 co-express early and late rPGC markers. (a) H&E of a D28 embryo with key anatomical structures labeled; me=mesonephros, da=dorsal aorta, nc=notochord, nt=neural tube, gre=genital ridge epithelium, dm=dorsal mesentery; hg=hindgut. scale bars, 200 $\mu$ m. (b) The majority of TFAP2C (green) and OCT4 (green) positive D28 rPGCs co-express the late stage rPGC marker, VASA (red) while located in the dorsal mesentery and in the genital ridge epithelium. scale bars, 15 $\mu$ m. N=3 biological replicates of CS12, D28 embryos.

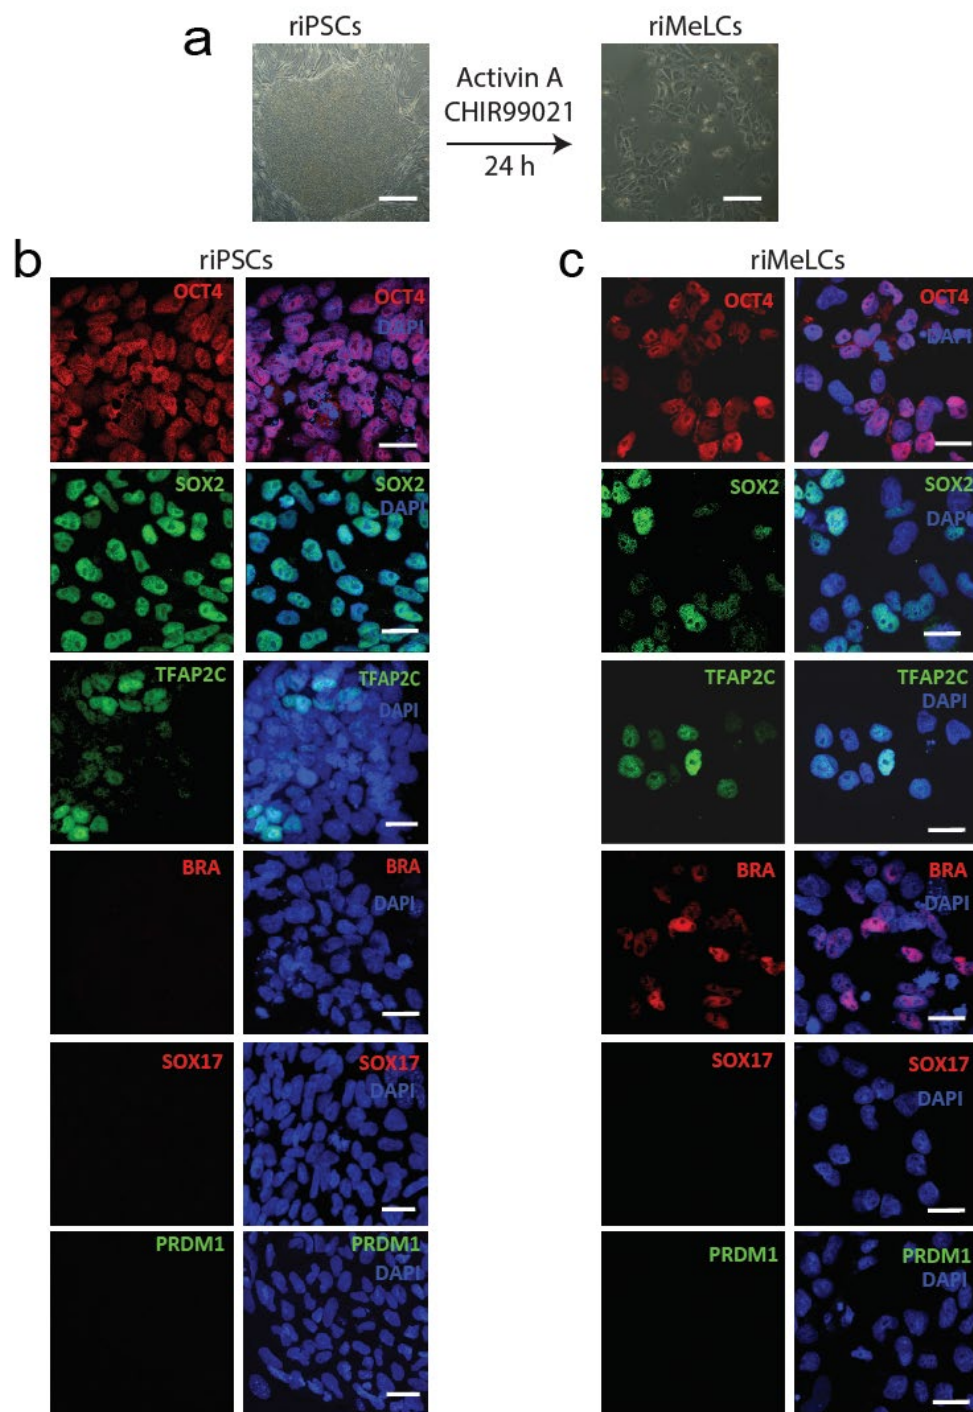

**Supplementary Figure 2** | SOX17 and PRDM1 not expressed in riPSCs or riMeLCs. (a) Induction of riMeLCs after 24 hours in media containing Activin A and CHIR99021. (b) IF staining of riPSCs colonies reveals homogenous expression of OCT4 (red) and SOX2 (green). In contrast, TFAP2C (green) is heterogeneously expressed. Brachyury (BRA), SOX17, and PRDM1 are undetectable in undifferentiated riPSCs. Scale bars,

20 $\mu$ m. (c) IF staining of riMeLCs reveals that unlike riPSCs, BRA (red) is induced and SOX2 (green) is down-regulated. SOX17, and PRDM1 protein were not detected in riMeLCs. Scale bars, 20 $\mu$ m. Shown are results using the riPSC89 line. N= 3 biological replicates of riPSC89 line.

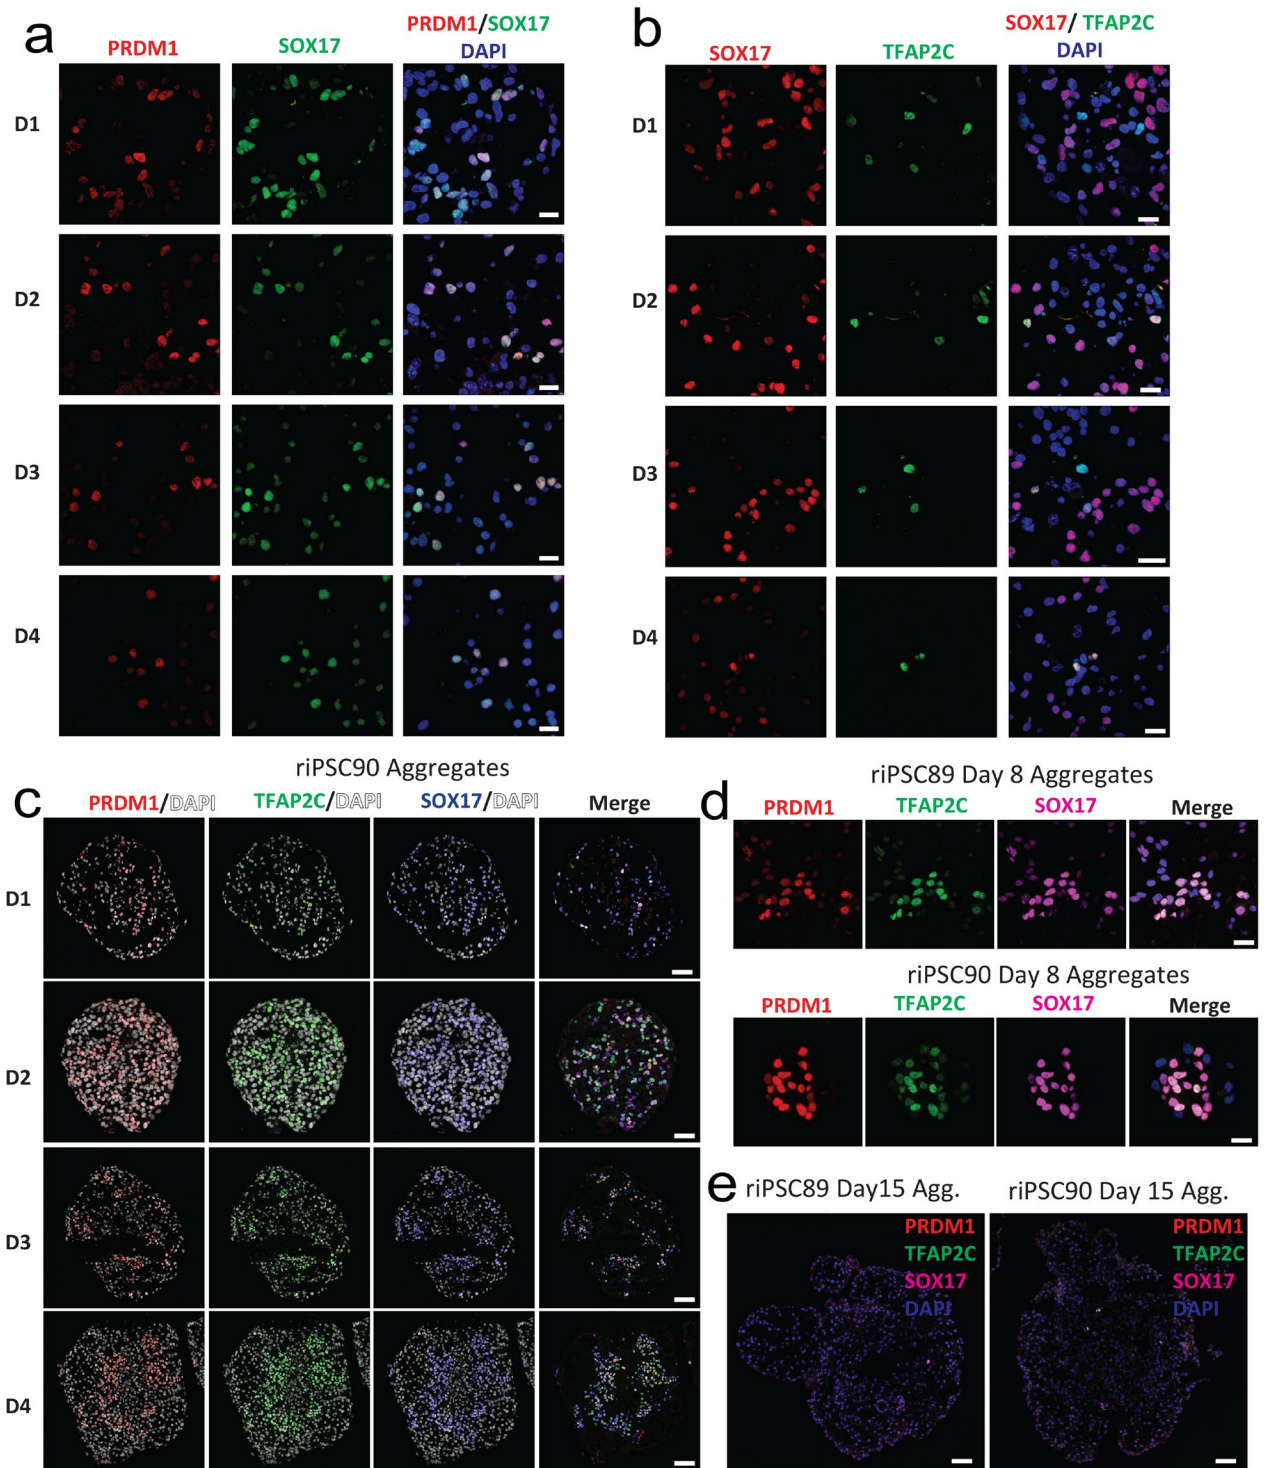

**Supplementary Figure 3** | PRDM1, TFAP2C, and SOX17 detected in rPGCLCs. (a) Double Immunofluorescence (IF) staining for PRDM1 (red) and SOX17 (green) and the nuclear stain DAPI (blue) identifies double positive cells at day (D) 1 of riPSC89

aggregate differentiation. Scale bars, 20 $\mu$ m. (b) Double IF staining for SOX17 (red) and TFAP2C (green) and the nuclear stain DAPI (blue), identifies double positive cells emerging between D1 and D2 of riPSC89 aggregate differentiation. Scale bars, 20 $\mu$ m. (c) Triple IF staining for PRDM1 (red), TFAP2C (green), SOX17 (blue) and the nuclear stain DAPI (white) identifies triple positive cells as early as D1 of aggregate differentiation in riPSC90. Scale bars, 40 $\mu$ m. (d) Triple IF staining of D8 aggregates for PRDM1 (red), TFAP2C (green), SOX17 (magenta) and the nuclear stain DAPI (blue) identified triple positive rPGCLCs from riPSC89 and riPSC90 lines. Scale bars, 20 $\mu$ m. (e) At day 15 of aggregate formation, no triple-positive rPGCLCs are identified in either riPSC89 or riPSC90. Scale bars, 40 $\mu$ m. N= 3 biological replicates of each riPSCs line (riPSC89 and riPSC90).

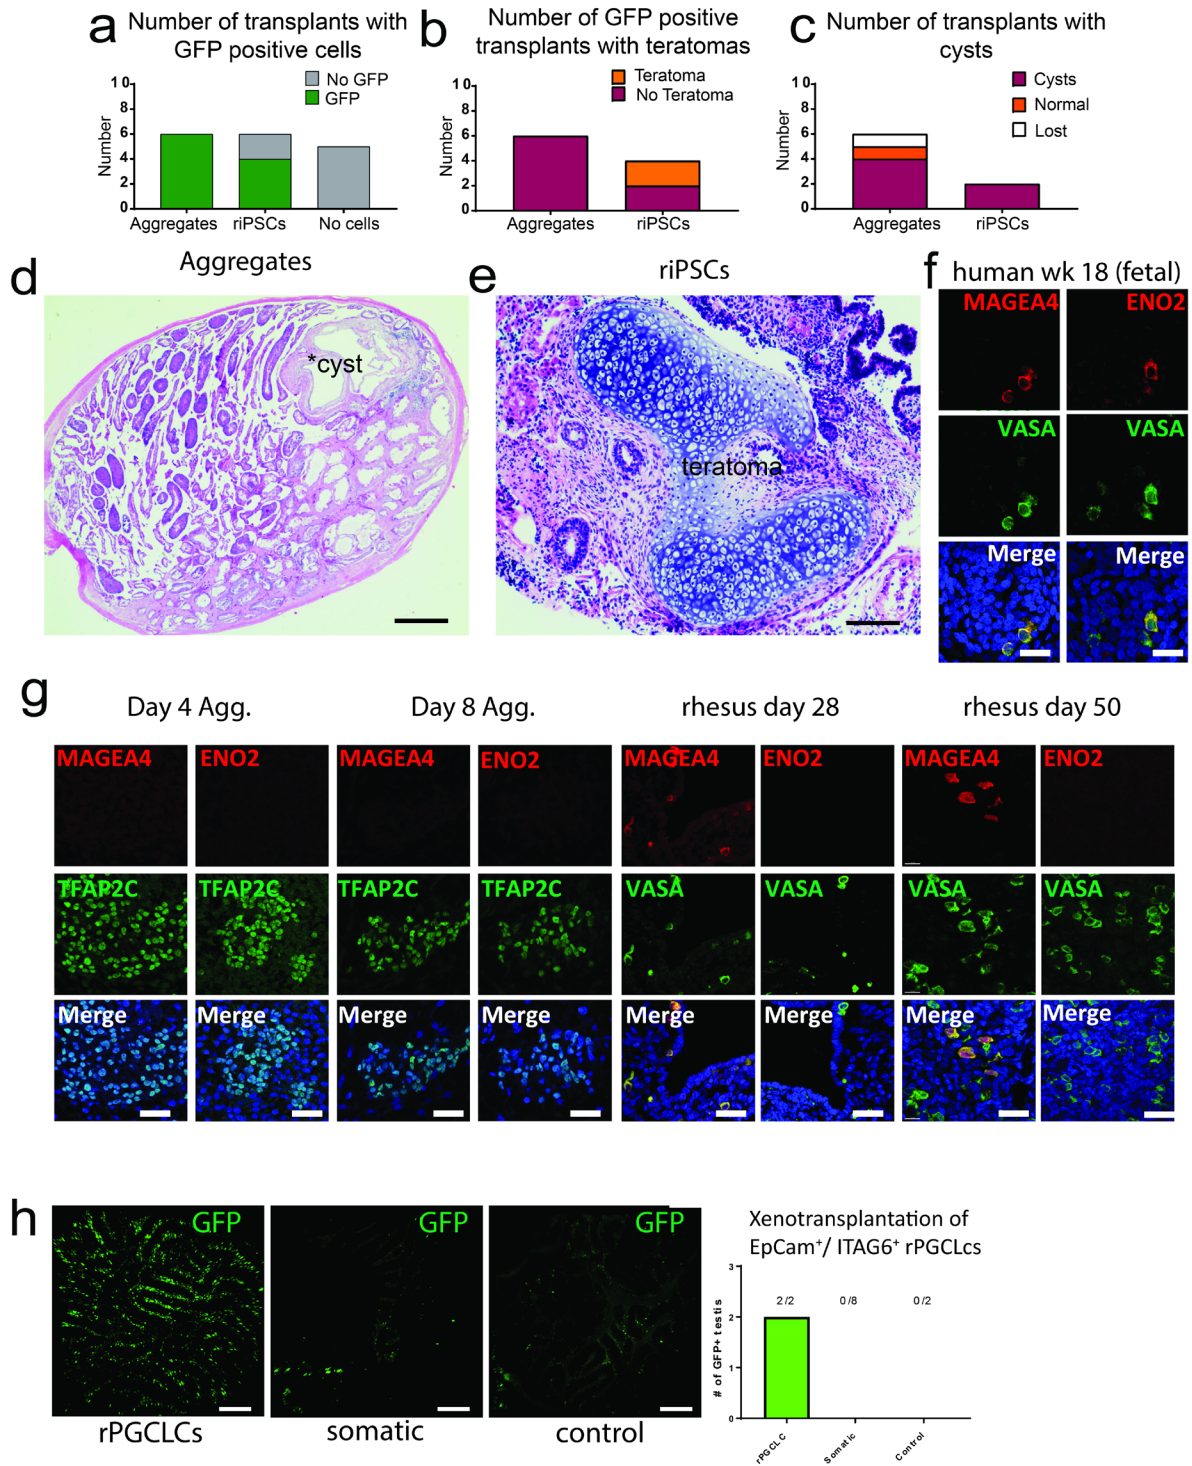

**Supplementary Figure 4** | Xenotransplantation of donor cells, riPSC89<sup>UbiC:GFP</sup>. (a) Number of xenotransplants containing GFP positive (+) cells. (b) Number of GFP<sup>+</sup> xenotransplants with teratomas. (c) Number of GFP<sup>+</sup> xenotransplants that formed cysts. (d) Histological section (H&E) of recipient mouse testis which received aggregate cells

formed large cysts in 4/6 replicates (asterisk) near normal seminiferous tubules. (e) Histological section (H&E) of recipient mouse testicles that received iPSCs resulted in teratoma formation in 2/4 replicates. (f) Both MAGEA4 (red) and ENO2 (red) expression are observed in 18-week fetal hPGCs positive for VASA (green), and the nuclear marker DAPI (blue). (g) In contrast MAGEA4 (red) and ENO2 (red) expression are not observed in day (D) D4 or D8 aggregates containing TFAP2C<sup>+</sup>(green) rPGCLCs. MAGEA4 (red) is detectable in D28 (CS12) and Day 50 (CS23) VASA positive rPGCs (green) and the nuclear marker DAPI (blue). Scale bars, 20µm. N= 3 biological replicates for D4, D8, and D28 (CS12); n=2 biological replicates for Day 50 (CS23) (h). Detection and quantification of testicles with GFP signal (green; donor cells) within recipient seminiferous tubules, following xenotransplantation with FACS isolated D4 rPGCLCs (EPCAM<sup>+</sup>/ITGA6<sup>+</sup>; n=2 testicles) or the aggregate somatic cells (EPCAM/ITGA6 double negative; n=8 testicles). The control group (sham; n=2 testicles) was not manipulated. Scale bars, 40µm.



Xenotransplantation

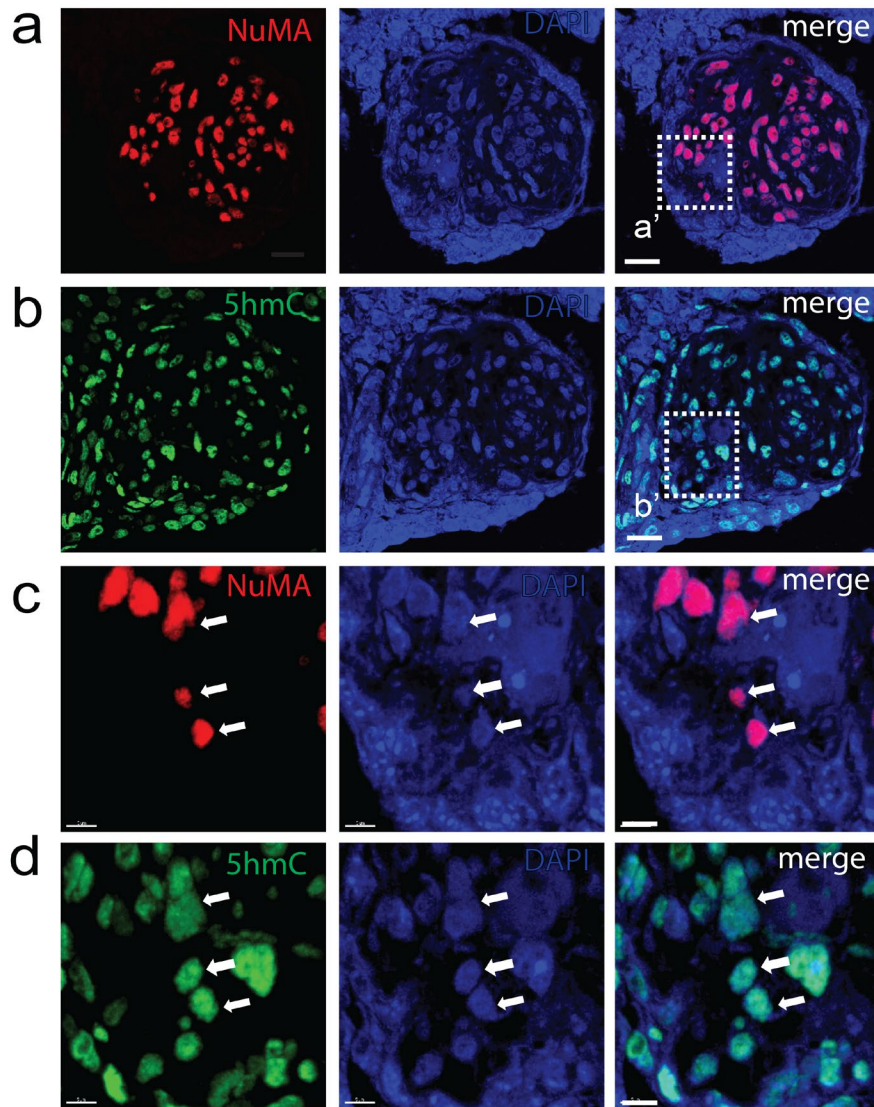

**Supplementary Figure 5|** Serial-section immunofluorescence on recipient testicles. (a) Detection of donor specific, NuMA- positive (+) cells (red) in the seminiferous tubules of recipients.(b) 5hmC<sup>+</sup> cells (green) detected in the seminiferous tubules of recipients, in the corresponding serial section. Nuclei were detected using DAPI (blue). (c) Higher power view of cells within the white box of a', which detect NuMA (red). (d) Higher power view of cells with white box of b', which detect 5hmC (green). (c,d) Arrows identify donor cells (NuMA<sup>+</sup>/ DAPI<sup>+</sup>) detected in both serial sections, and therefore correspond to NuMA<sup>+</sup> cells that are enriched in 5hmC. Scale bars, 10µm. N= 13 transplanted recipient testicles.

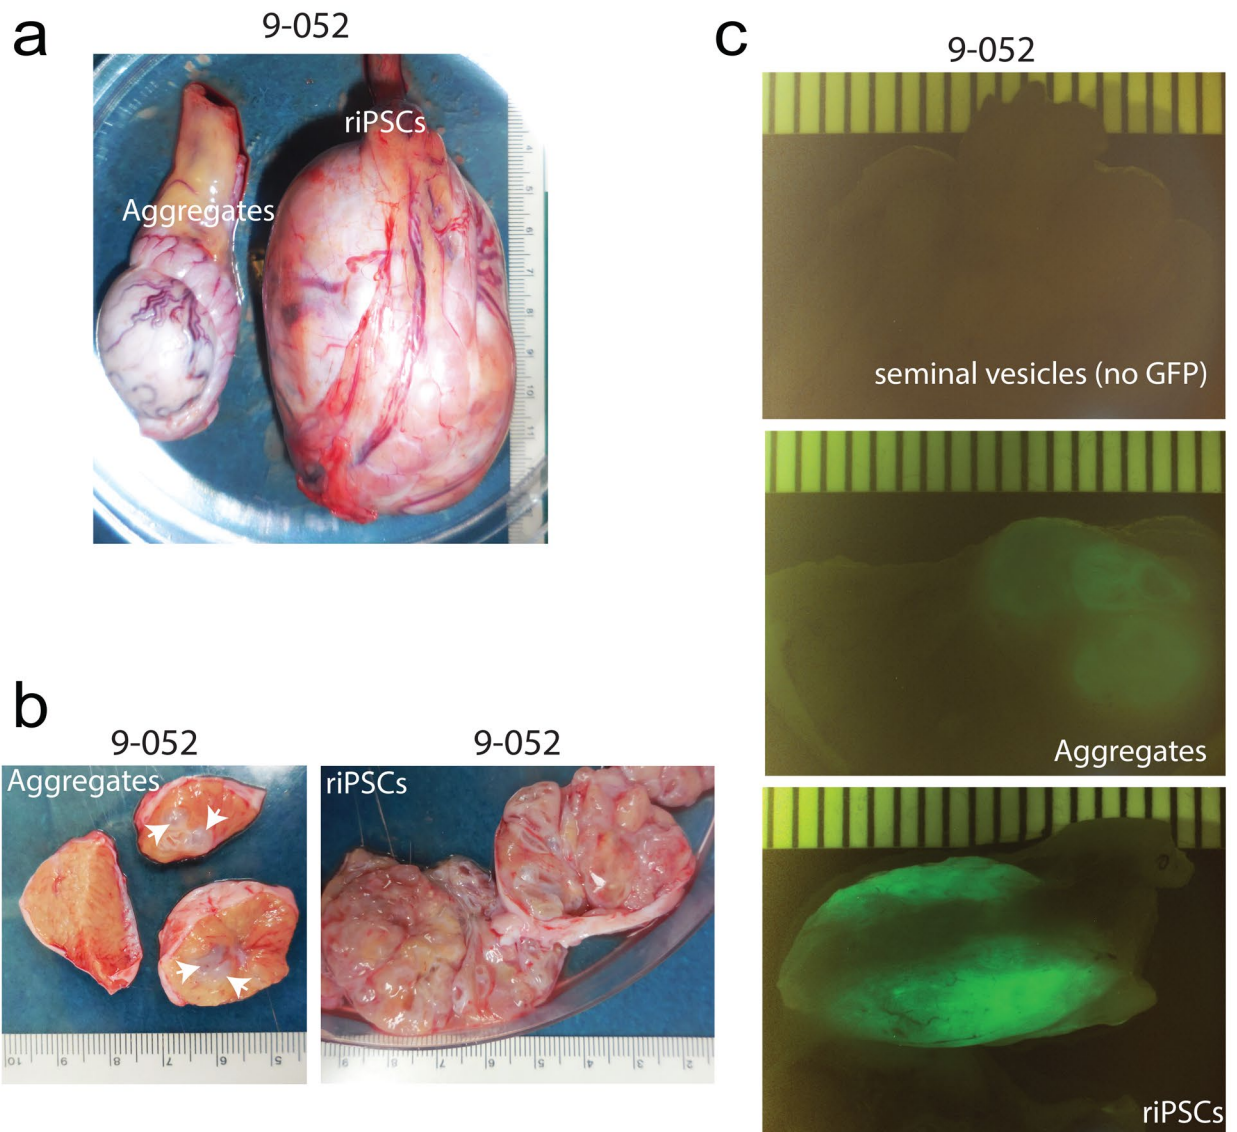

**Supplementary Figure 6|** Recipient testicles after homologous transplantation. (a) The size of the recipient testicle (animal 9-052) that received undifferentiated riPSCs was visually larger than the contralateral testicle that received donor aggregate cells. (b) Dissected testicle from animal 9-052, reveal the existence of cysts when aggregate cells were transplanted or teratoma when undifferentiated riPSCs were transplanted. (c) Control seminiferous vesicles did not have GFP signal, whereas GFP was detected in the testicle that received aggregates and the testicle that received riPSCs.

**Supplementary Table 1. List of antibodies used for experiments**

| <b>Antibody</b>                                | <b>Company/Supplier</b>   | <b>Catalog #</b> | <b>Dilution</b> |
|------------------------------------------------|---------------------------|------------------|-----------------|
| mouse anti-5mC                                 | Aviva Biosciences         | AMM99021         | 1:100           |
| goat anti-Oct4                                 | Santa Cruz Biotechnology  | sc8628, X        | 1:100           |
| mouse anti-OCT3/4 (IgG2b)                      | Santa Cruz Biotechnology  | sc5279           | 1:100           |
| mouse anti-TFAP2C                              | Santa Cruz Biotechnology  | sc12762          | 1:200           |
| rabbit anti-TFAP2C                             | Santa Cruz Biotechnology  | sc8977           | 1:200           |
| rabbit anti-PRDM1                              | Cell Signaling Technology | 9115S            | 1:100           |
| goat anti-SOX17                                | Neuromics                 | GT15094          | 1:100           |
| mouse anti-SOX2 (IgG2a)                        | R&D Systems               | MAB2018          | 1:100           |
| goat anti-VASA                                 | R&D Systems               | AF2030           | 1:100           |
| goat anti-Brachyury/T                          | R&D Systems               | AF2085           | 1:100           |
| rabbit anti-Non Human Primate (NHP) cell       | Dr. Orwig                 | N/A              | 1:200           |
| mouse anti-MAGE A4                             | Dr. Spagnoli              | Clone 57B        | 1:30            |
| mouse anti-ENO2                                | BioLegend                 | MMS-518P         | 1:500           |
| mouse anti-GFP                                 | Cell Signaling Technology | 2956S            | 1:100           |
| rabbit anti-5hmC                               | Active Motif              | 39769            | 1:100           |
| mouse anti-5hmC                                | Cell Signaling Technology | 51660S           | 1:100           |
| mouse anti-Ki67                                | Pharmlingen               | 556003           | 1:200           |
| rabbit-anti-NuMA                               | Abcam                     | Ab84680          | 1:200           |
| AlexaFluor 488, Donkey anti-goat IgG (H + L)   | JacksonImmunoResearch     | 705-546-147      | 1:200           |
| AlexaFluor 488, Donkey anti-mouse IgG (H + L)  | JacksonImmunoResearch     | 715-546-150      | 1:500           |
| AlexaFluor 488, Donkey anti-rabbit IgG (H + L) | LifeTechnologies          | A21206           | 1:500           |
| AlexaFluor 488, Goat anti-mouse IgG2a          | LifeTechnologies          | A21131           | 1:200           |
| AlexaFluor 594, Donkey anti-mouse IgG2b        | LifeTechnologies          | A21145           | 1:200           |
| AlexaFluor 594, Donkey anti-goat IgG (H + L)   | JacksonImmunoResearch     | 705-586-147      | 1:200           |
| AlexaFluor 594, Donkey anti-rabbit IgG (H + L) | JacksonImmunoResearch     | 711-585-152      | 1:200           |
| AlexaFluor 594, Donkey anti-mouse IgG (H + L)  | LifeTechnologies          | A21203           | 1:500           |
| AlexaFluor 647, Donkey anti-goat IgG (H + L)   | LifeTechnologies          | A21447           | 1:200           |
| AlexaFluor 647, Donkey anti-rabbit IgG (H + L) | LifeTechnologies          | A31573           | 1:200           |
